# Supplementary material for: The value of speckle-tracking stratified strain combined with myocardial work measurement in evaluating left ventricular function in patients with heart failure with preserved ejection fraction
Source: PubMed Central journal article supplement — Quant Imaging Med Surg. 2024 Mar 4;14(3):2514–27. doi: 10.21037/qims-23-1143 (PMC10963819; doi:10.21037/qims-23-1143), 2024-03-04
Supplement: qims-14-03-2514-supplementary.pdf [file qims-14-03-2514-supplementary.pdf]

**Table S1** Collinearity among the variables

| Variable     | GLSendo    | GLSmyo     | GLSepi     | $\Delta$ GLS | GWI        | GCW        | GWW        | GWE        |
|--------------|------------|------------|------------|--------------|------------|------------|------------|------------|
| GLSendo      | 1.0000000  | 0.9753538  | 0.9738902  | 0.9778983    | -0.8255900 | -0.7919999 | 0.3872230  | -0.5237344 |
| GLSmyo       | 0.9753538  | 1.0000000  | 0.9593204  | 0.9464148    | -0.8061497 | -0.7852991 | 0.3513478  | -0.4835264 |
| GLSepi       | 0.9738902  | 0.9593204  | 1.0000000  | 0.9058257    | -0.7837603 | -0.7568263 | 0.3163845  | -0.4371486 |
| $\Delta$ GLS | 0.9778983  | 0.9464148  | 0.9058257  | 1.0000000    | -0.8270022 | -0.7913221 | 0.4351369  | -0.5790045 |
| GWI          | -0.8255900 | -0.8061497 | -0.7837603 | -0.8270022   | 1.0000000  | 0.9698087  | -0.3707544 | 0.4870180  |
| GCW          | -0.7919999 | -0.7852991 | -0.7568263 | -0.7913221   | 0.9698087  | 1.0000000  | -0.3490359 | 0.5090048  |
| GWW          | 0.3872230  | 0.3513478  | 0.3163845  | 0.4351369    | -0.3707544 | -0.3490359 | 1.0000000  | -0.3611222 |
| GWE          | -0.5237344 | -0.4835264 | -0.4371486 | -0.5790045   | 0.4870180  | 0.5090048  | -0.3611222 | 1.0000000  |

GLSendo, global longitudinal strain of subendocardium; GLSmyo, global longitudinal strain of myocardium; GLSepi, global longitudinal strain of subepicardium;  $\Delta$ GLS, transmural gradient of global longitudinal strain; GWI, global myocardial work index; GCW, global myocardial constructive work; GWW, global myocardial wasted work; GWE, global myocardial work efficiency.

**Table S2** Principal component analysis

| Variable     | PC1       | PC2        | PC3         | PC4       | PC5        | PC6        | PC7         | PC8          |
|--------------|-----------|------------|-------------|-----------|------------|------------|-------------|--------------|
| GLSendo      | 0.4010051 | 0.12797544 | 0.081591467 | 0.2604638 | 0.08511564 | 0.24807306 | 0.157922956 | 0.8090392752 |
| GLSmyo       | 0.3933049 | 0.17580012 | 0.102206080 | 0.2563187 | 0.05857815 | 0.74430516 | 0.425247526 | 0.0017769114 |
| GLSepi       | 0.3840215 | 0.22820903 | 0.138521383 | 0.2890481 | 0.62914839 | 0.36035437 | 0.111308427 | 0.3995480759 |
| $\Delta$ GLS | 0.3986318 | 0.03030077 | 0.026560740 | 0.2179079 | 0.73281159 | 0.09741572 | 0.245766843 | 0.4301920588 |
| GWI          | 0.3752587 | 0.08010353 | 0.007442325 | 0.5655097 | 0.10929670 | 0.36754169 | 0.620902236 | 0.0188536251 |
| GCW          | 0.3675868 | 0.07151657 | 0.074401478 | 0.6233219 | 0.15260327 | 0.33108418 | 0.576546431 | 0.0197290712 |
| GWW          | 0.1942046 | 0.82261478 | 0.527502969 | 0.0172615 | 0.08210996 | 0.01662637 | 0.003665575 | 0.0004795524 |
| GWE          | 0.2539130 | 0.45988350 | 0.824067765 | 0.1636988 | 0.12044635 | 0.01201761 | 0.059119914 | 0.0018697451 |

PC, principal component; GLSendo, global longitudinal strain of subendocardium; GLSmyo, global longitudinal strain of myocardium; GLSepi, global longitudinal strain of subepicardium;  $\Delta$ GLS, transmural gradient of global longitudinal strain; GWI, global myocardial work index; GCW, global myocardial constructive work; GWW, global myocardial wasted work; GWE, global myocardial work efficiency.

**Table S3** Results of the ULRM prediction models for impaired LV systolic function in HFpEF

| Variable         | AUC   | Cutoff value | Sensitivity (%) | Specificity (%) |
|------------------|-------|--------------|-----------------|-----------------|
| GLSendo (%)      | 0.841 | 0.581        | 68.0            | 100             |
| GLSmyo (%)       | 0.805 | 0.575        | 64.0            | 95.8            |
| GLSepi (%)       | 0.790 | 0.583        | 64.0            | 91.7            |
| $\Delta$ GLS (%) | 0.891 | 0.579        | 72.0            | 100             |
| GWI (mmHg%)      | 0.792 | 0.489        | 80.0            | 79.2            |
| GCW (mmHg%)      | 0.795 | 0.331        | 95.7            | 61.9            |
| GWW (mmHg%)      | 0.752 | 0.433        | 68.0            | 87.5            |
| GWE (%)          | 0.882 | 0.322        | 92.0            | 66.7            |

ULRM, univariate logistic regression model; LV, left ventricular; HFpEF, heart failure with preserved ejection fraction; AUC, area under the curve; GLSendo, global longitudinal strain of subendocardium; GLSmyo, global longitudinal strain of myocardium; GLSepi, global longitudinal strain of subepicardium;  $\Delta$ GLS, transmural gradient of global longitudinal strain; GWI, global myocardial work index; GCW, global myocardial constructive work; GWW, global myocardial wasted work; GWE, global myocardial work efficiency. GMW, global myocardial work.

**Table S4** Comparison of derivation cohort with validation cohort for HFpEF and Control groups

| Variable                                                | HFpEF group                  |                           |         | Control group                   |                           |         |
|---------------------------------------------------------|------------------------------|---------------------------|---------|---------------------------------|---------------------------|---------|
|                                                         | Derivation cohort (n=49)     | Validation cohort (n=15)  | P value | Derivation cohort (n=49)        | Validation cohort (n=15)  | P value |
| <b>Clinical characteristics</b>                         |                              |                           |         |                                 |                           |         |
| Age (years)                                             | 67.39±7.69                   | 69.53±6.25                | 0.33    | 64.89±9.17                      | 62.20±6.30                | 0.30    |
| Female gender                                           | 28 [57]                      | 10 [67]                   | 0.51    | 20 [43]                         | 8 [53]                    | 0.51    |
| Height (cm)                                             | 165.82±6.97                  | 164.80±3.59               | 0.59    | 166.89±5.35                     | 164.67±5.01               | 0.16    |
| Weight (kg)                                             | 66.08±10.23                  | 67.87±4.98                | 0.52    | 61.33±10.79                     | 61.40±4.14                | 0.98    |
| BMI (kg/m <sup>2</sup> )                                | 24.03±3.53                   | 25.12±1.76                | 0.26    | 21.88±2.52                      | 22.71±1.71                | 0.24    |
| HR (beats/min)                                          | 75.57±7.20                   | 76.13±9.40                | 0.81    | 72.61±9.99                      | 69.87±3.85                | 0.31    |
| SBP (mmHg)                                              | 142 [125 to 146.50]          | 139 [135 to 144]          | 0.68    | 125.37±10.05                    | 122.47±10.13              | 0.34    |
| DBP (mmHg)                                              | 86.18±12.65                  | 84.60±4.58                | 0.64    | 77 [73.25 to 84]                | 72 [70 to 80]             | 0.09    |
| NT-proBNP (pg/mL)                                       | 674 [418.50 to 1115]         | 678 [230 to 1145]         | 0.51    | 62.33±22.67                     | 54.73±8.19                | 0.21    |
| <b>NYHA</b>                                             |                              |                           |         |                                 |                           |         |
| II                                                      | 21 [43]                      | 6 [40]                    | 0.85    |                                 |                           |         |
| III                                                     | 23 [47]                      | 5 [33]                    | 0.35    |                                 |                           |         |
| IV                                                      | 5 [10]                       | 4 [27]                    | 0.11    |                                 |                           |         |
| <b>Comorbidity</b>                                      |                              |                           |         |                                 |                           |         |
| Hypertension                                            | 33 [67]                      | 8 [53]                    | 0.32    |                                 |                           |         |
| Coronary artery disease                                 | 27[55]                       | 6 [40]                    | 0.31    |                                 |                           |         |
| Diabetes mellitus                                       | 14 [29]                      | 6 [40]                    | 0.40    |                                 |                           |         |
| Paroxysmal atrial fibrillation                          | 9 [18]                       | 2 [13]                    | 0.65    |                                 |                           |         |
| <b>Conventional echocardiography parameters</b>         |                              |                           |         |                                 |                           |         |
| LAd (mm)                                                | 40 [36 to 42.5]              | 37 [30 to 45]             | 0.61    | 36.34±3.48                      | 34.67±2.58                | 0.10    |
| E/A                                                     | 0.77 [0.62 to 0.87]          | 0.85 [0.70 to 1.26]       | 0.46    | 1.31 [1.24 to 1.40]             | 1.20 [1.14 to 1.35]       | 0.11    |
| The average E/e'                                        | 15.26 [13.25 to 16.94]       | 15.80 [12.60 to 18.40]    | 0.57    | 6.49±1.75                       | 7.34±0.67                 | 0.07    |
| IVSd (mm)                                               | 11.02±1.18                   | 11.25±1.45                | 0.52    | 8.96±1.08                       | 8.55±0.80                 | 0.18    |
| LVPWd (mm)                                              | 10.72±1.35                   | 11.02±1.29                | 0.45    | 8.96 [7.74 to 9.56]             | 9.00 [8.30 to 9.50]       | 0.59    |
| RWT (mm)                                                | 0.46±0.06                    | 0.48±0.06                 | 0.29    | 0.39±0.07                       | 0.38±0.03                 | 0.67    |
| LVMI (g/m <sup>2</sup> )                                | 109.90±17.52                 | 108.00±14.21              | 0.70    | 84.64±17.77                     | 79.72±9.59                | 0.31    |
| LVEDd (mm)                                              | 47 [45 to 49]                | 46 [45 to 47]             | 0.18    | 45.87±3.01                      | 45.53±1.60                | 0.68    |
| EDV (mL)                                                | 104.63±13.84                 | 98.20±12.91               | 0.11    | 99.89±14.39                     | 97.33±10.58               | 0.53    |
| ESV (mL)                                                | 40.61±7.92                   | 39.67±4.35                | 0.66    | 38.33±7.23                      | 35.47±5.42                | 0.17    |
| LVEF (%)                                                | 60.18±4.04                   | 59.93±2.76                | 0.82    | 60.50 [60 to 64]                | 61 [60 to 64]             | 0.39    |
| <b>Stratified longitudinal strain and MW parameters</b> |                              |                           |         |                                 |                           |         |
| GLSendo (%)                                             | -20.90<br>[-22.60 to -19.10] | -21.14 [-21.71 to -18]    | 0.40    | -24.18±1.90                     | -24.28±2.86               | 0.87    |
| GLSmyo (%)                                              | -18.20<br>[-19.95 to -16.90] | -19.10 [-20 to -17]       | 0.56    | -20.46±1.67                     | -21.14±3.11               | 0.28    |
| GLSepi (%)                                              | -16.37±1.38                  | -15.81±2.05               | 0.23    | -17.59±0.96                     | -18.20±3.50               | 0.29    |
| ΔGLS (%)                                                | -4.50 [-5.55 to -3.95]       | -3.71 [-5.14 to -2.60]    | 0.09    | -6.58±0.97                      | -6.08±1.97                | 0.19    |
| GWI (mmHg%)                                             | 1,818<br>[1,662 to 1,959]    | 1,996<br>[1,625 to 2,171] | 0.11    | 2,123.50<br>[1,874.25 to 2,336] | 2,014<br>[1,689 to 2,101] | 0.15    |
| GCW (mmHg%)                                             | 2,092.18±255.52              | 2,221.00±284.90           | 0.10    | 2,419 [2,069 to 2,611.25]       | 2,303 [2,013 to 2,429]    | 0.09    |
| GWW (mmHg%)                                             | 87.48 [66.23 to 121.50]      | 62 [40 to 135]            | 0.13    | 60.50 [48.75 to 73.75]          | 54 [48 to 84]             | 0.80    |
| GWE (%)                                                 | 94.29±2.56                   | 95.67±1.84                | 0.06    | 98 [96.75 to 99]                | 97 [95 to 98]             | 0.10    |

Data are expressed as the n [%], mean ± SD, or M [P25 to P75]. HFpEF, heart failure with preserved ejection fraction; BMI, body mass index; HR, heart rate; SBP, systolic blood pressure; DBP, diastolic blood pressure; NT-proBNP, N-terminal-pro-brain natriuretic peptide; NYHA, New York Heart Association; BP, blood pressure. 1 mmHg=0.133 kPa. LAd, left atrial diameter; E/A, the ratio of mitral valve peak early to late diastolic filling velocity; E/e', the ratio of early mitral inflow velocity to mitral annular early diastolic velocity; IVSd, interventricular septal thickness in diastole; LVPWd, left ventricular posterior wall thickness in diastole; RWT, relative wall thickness; LVMI, left ventricular mass index; LVEDd, left ventricular end-diastolic diameter; EDV, end-diastolic volume; ESV, end-systolic volume; LVEF, left ventricular ejection fraction. MW, myocardial work; GLSendo, global longitudinal strain of subendocardium; GLSmyo, global longitudinal strain of myocardium; GLSepi, global longitudinal strain of subepicardium; ΔGLS, transmural gradient of global longitudinal strain; GWI, global myocardial work index; GCW, global myocardial constructive work; GWW, global myocardial wasted work; GWE, global myocardial work efficiency.
